# Supplementary material
Source: PubMed Central journal article supplement (PMC1805622)
Supplement: pnas_0607703104_1.pdf [file pnas_0607703104_1.pdf]

Mca1 1 -----MSHSWDLGGEIASVAQLTGLDAVKLIGLIVKAANTAWMHKKNCRQFAQHLKLIENLLEQLKIS---EKKYYPETREPLEGLEDALRRSYLLVNSCRDR--SYLYLLAMGWNIV  
OsMca1 1 -----MASWENLGDVATVVLQTLGLDAVRLISMIYKAASTARLHKRNCRRFAQHLKLIENLLEQLRVS---EKKYYPETREPLEGLEDALRRAYLLVHSCQDR--SYLYLLAMGWNIV  
Mca2 1 -----MANSWDLGGEIASVAQLTGLDALKLIGMIVNAANTARMHKKNCRQFAHHLKLIENLLEQLKNS---ENQRSEILEPLOGLDLRRSYLLVKSCQEK--SYLYLLAMGWNIV  
tr|Q654Z6|Q654Z6\_ORYSA 1 -----MESSSLWGLVGOASSVAQLVGVDALGLVSMVAQAALARRHDAACRRLGQFAELVGGLLRELELA---ELMRREATRPLEQLQGLARRCYALATACQEDGGYHRLLLGARVA  
tr|Q2R001|Q2R001\_ORYSA 1 -----MALWSGLGQAATVAQLVGADVGGLSMIMQAAMTAQONKKECEQLARRVFTIAELLQHLQDP---DLRRPEIRRLPLTGLDDTLREAHVELVSCQDK--SAVYQLVMARRQA  
tr|Q2QZX6|Q2QZX6\_ORYSA 1 -----MWSGLGQAATVAQLVGADVGLSISIMQAAMTARONKKECEQLARRVFTIAELLPHLQDP---VMRRPEVRRPLAGLDLREAHVELVSCQGR--AAAYRLVMARRQA  
tr|Q2QZY3|Q2QZY3\_ORYSA 1 -----MALWGLGQAATVAQLVGADIGGLITMIMQAAMTAQONKKECEQLARRVFTIAELLQHLQDP---EVLRRPEIRRLPLTGLDDTLREAHVELVSCQDK--SAVYRLVMARRQA  
tr|Q2QQC1|Q2QQC1\_ORYSA 1 -----MALWSGLGQAATVAQLVGADVGLSISIMVQAAMTAQHMKKECEQLARRAFVIAELLPHLQDP---EVVCLPEIRRLPLVGLDDTLREAHVELVSCQEK--SVVHRLVMARRQA  
tr|Q2QZY4|Q2QZY4\_ORYSA 1 KEQNPDLASAIALWDVTGHAATVAQLVGADVGGLSMIMQAAMTAQONKKECEQLARRVFTIAELLQHLQDP---EVLRRPEIRRLPLTGLDDTLREAHVELVSCQDK--SAVYRLVMARRQA  
tr|Q5VMJ7|Q5VMJ7\_ORYSA 1 -----MAVWGLGQAATVAQLVGADVGGLSISIIQAAMTARONKRECDQLARRVVMIAADLLPHLQDP---EVMRRPEVRRPLAELGDTLREAHVELVSCQGR--SAAYRFVMAARRQA  
tr|Q5Z661|Q5Z661\_ORYSA 1 -----MASG-LWGLGQASSVAQLVGVD-----ACRRLGQVLDVGGLLRELELA---ELMRREATRRLERLQGLARRCYALVRAACQDCGYHRLLLGARVA  
tr|Q2QZT9|Q2QZT9\_ORYSA 1 -----MAS----EAVSMAANTLAQLTGVDAALGLITMIVEAAKAARRNKRITCLLRLAEVQVGDLLRALQEQPGVTVMERPETSAPLRELQETLRRAHVELVSCRRRGSYPRLRFAQKEQG  
tr|Q6ZB70|Q6ZB70\_ORYSA 1 -----MAAAVNLNALPAATVAQLAGADAAGLVSAITLQAVRAARRNRRECRLLARRAMVGDLLRLLPPE--ETMRRPEVRRALDGLGGALRQALELVESCQESGAVRGLVITAG--RQA

Mca1 109 YQFRKHQDEIDRFKTIPLITLVDNARIRERFEYIDRDQR-  
OsMca1 108 YQFRKAQNEIDNYLRVLPITLVDNARVRREYIERDQC-  
Mca2 109 NQFEKAQNEIDLFLKIVPLINMADNARIRERLEAIEDRQR-  
tr|Q654Z6|Q654Z6\_ORYSA 112 DELRAAQHEIDMYIRLIPLIALVDSASN-HRDK----- Receptor protein kinase-like - *Oryza sativa* (japonica cultivar-group)  
tr|Q2R001|Q2R001\_ORYSA 108 DRFRDVQSRIDSYLLVLPVLSLDITRRLDRIYNILLPTN- Serine/threonine protein kinase - *Oryza sativa* (japonica cultivar-group)  
tr|Q2QZX6|Q2QZX6\_ORYSA 105 ERFREVSQKIDSYLLVFPFISHIDITRRLDRIYRLLPNDT Protein kinase domain, putative - *Oryza sativa* (japonica cultivar-group)  
tr|Q2QZY3|Q2QZY3\_ORYSA 108 EKFRDVQSRIDSYLLVFPFISHMDITRRLDRIYNILLPND- Serine/threonine protein kinase - *Oryza sativa* (japonica cultivar-group)  
tr|Q2QQC1|Q2QQC1\_ORYSA 108 ERFREVSQSRIDSYLLVFPFISHIDITRRLDRIYRLLPNDH Protein kinase domain, putative - *Oryza sativa* (japonica cultivar-group)  
tr|Q2QZY4|Q2QZY4\_ORYSA 117 ERFRDVQSRIDSYLLVFPFISHIDITRRLDRIYNILLPTN- Serine/threonine protein kinase - *Oryza sativa* (japonica cultivar-group)  
tr|Q5VMJ7|Q5VMJ7\_ORYSA 108 DRFRDVQSKIDSYLLVFPFIHIDITRRLDQIVRILAPNDT Cytokinin-regulated kinase-like - *Oryza sativa* (japonica cultivar-group)  
tr|Q5Z661|Q5Z661\_ORYSA 91 DELRAAQHEIDMYIRLIPLISLVDSSNNRRVY----- Receptor protein kinase-like - *Oryza sativa* (japonica cultivar-group)  
tr|Q2QZT9|Q2QZT9\_ORYSA 111 ESLREVSQKISIIYQLFPFIHIDITRRLVRRVI----- Protein kinase domain, putative - *Oryza sativa* (japonica cultivar-group)  
tr|Q6ZB70|Q6ZB70\_ORYSA 111 EQFREVSQGEINQYMLLFPVSHIDITRRLDLYIGLLLPADS Receptor-like kinase CHRK1-like - *Oryza sativa* (japonica cultivar-group)
