# Supplementary material
Source: PubMed Central journal article supplement (PMC1805622)

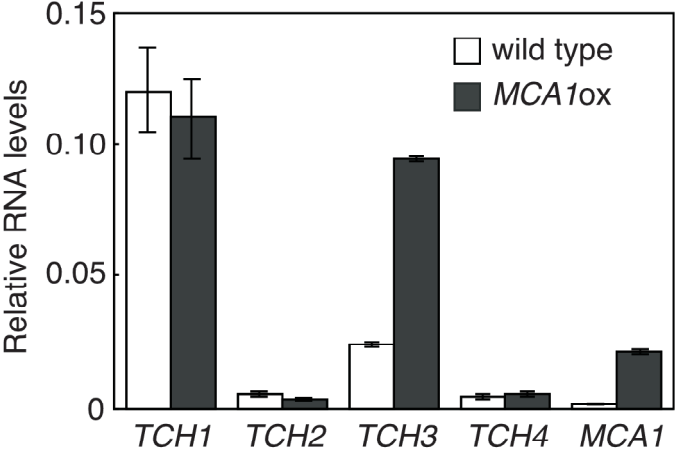

Supplement: pnas_0607703104_2.pdf [file pnas_0607703104_2.pdf]
